# Supplementary figures and images for: High throughput laser ablation ICP-MS bioimaging of silver distribution in animal organisms and plant tissue after exposure to silver sulfide nanoparticles
Source: Royal Society of Chemistry journal article supplement (doi:10.1039/d3ja00223c), 2023-01-01

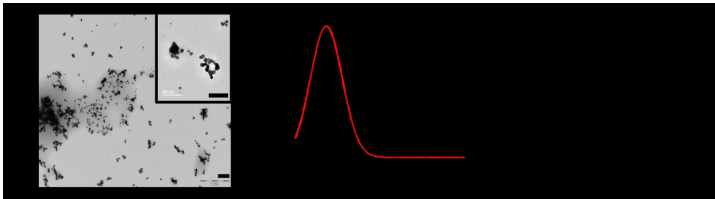

Supplement: d3ja00223c1.pdf [file d3ja00223c1.pdf]

Cross  
section

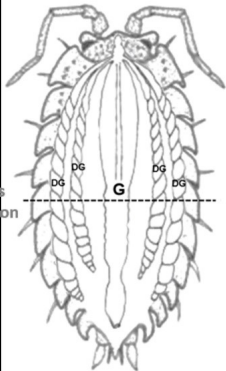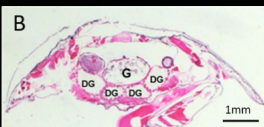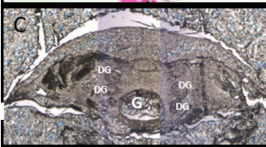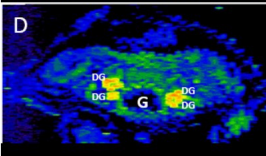

Supplement: d3ja00223c2.pdf [file d3ja00223c2.pdf]

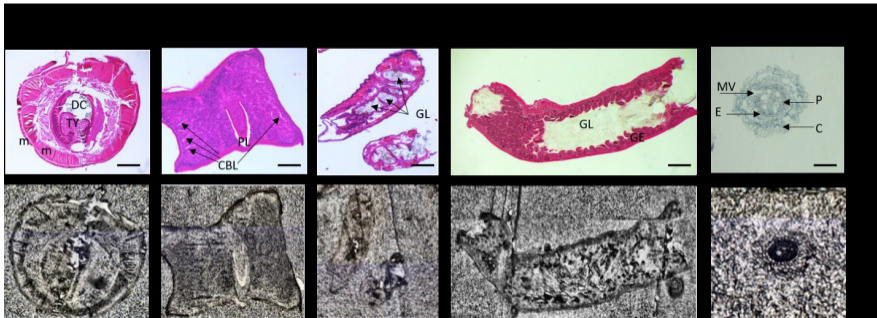

Supplement: d3ja00223c3.pdf [file d3ja00223c3.pdf]

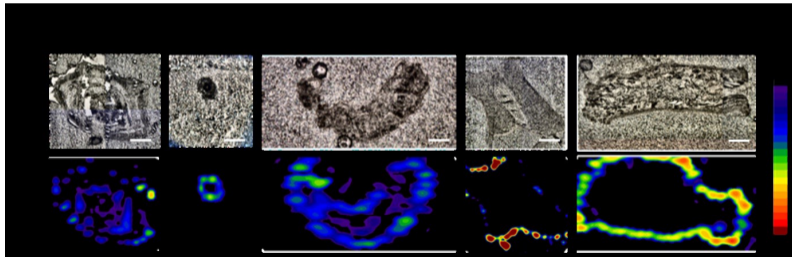

Supplement: d3ja00223c4.pdf [file d3ja00223c4.pdf]

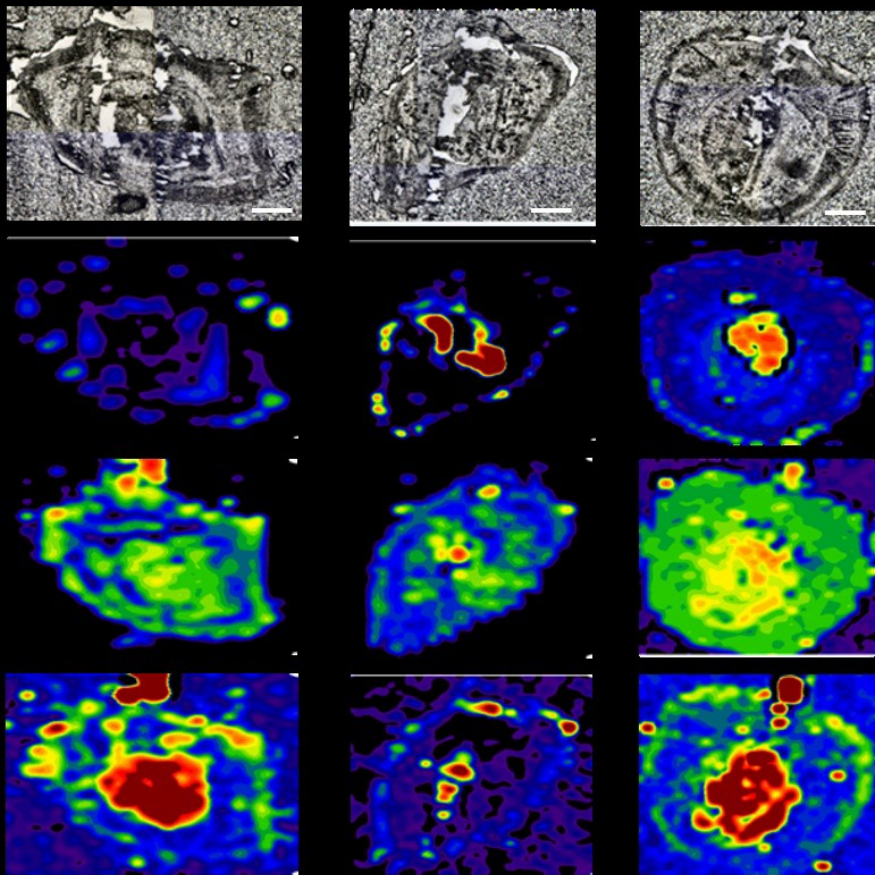

Supplement: d3ja00223c5.pdf [file d3ja00223c5.pdf]
